# Supplementary material
Source: publisher site journal article supplement (https://www.dovepress.com/article/381222)
Supplement: Supplementary file 1 [file get_supplementary_file.php]

Supplementary Material

Micro/Nano-Structured Topography on Titanium Orchestrates Dendritic Cell Adhesion and Activation via β2 Integrin-FAK Signals

Yang Yang1, 2*, Yujing Lin1, 2*, Ruogu Xu1,2, Zhengchuan Zhang1, 2, Wenyi Zeng1, 2, Qiong Xu1, 2, Feilong Deng1, 2

1Department of Oral Implantology, Guanghua School of Stomatology, Hospital of Stomatology, Sun Yat-Sen University, Guangzhou, PR China

2Guangdong Provincial Key Laboratory of Stomatology, Guangzhou, PR China

*These authors have contributed equally to this work and share first authorship

Correspondence: Qiong Xu, Feilong Deng

Department of Oral Implantology, Hospital of Stomatology, Guanghua School of Stomatology, Sun Yat-Sen University, No. 56, Ling Yuan Xi Road, Guangzhou, 510055, People’s Republic of China

Tel +86 20 83862537

Fax +86 20 83822807

Email [xqiong@mail.sysu.edu.cn](mailto:xqiong@mail.sysu.edu.cn)

[dengfl@mail.sysu.edu.cn](mailto:dengfl@mail.sysu.edu.cn)

**Supplementary Table 1.** Primer pairs used in the qRT-PCR

| Genes | Primer sequences |
| --- | --- |
| mIL-10 | Forward: 5’-GGTTGCCAAGCCTTATCGGA-3’  Reverse: 5’-ACCTGCTCCACTGCCTTGCT-3’ |
| mIL-1β | Forward: 5’-TGGAGAGTGTGGATCCCAAG-3’  Reverse: 5’-GGTGCTGATGTACCAGTTGG-3’ |
| mCD83 | Forward: 5’-CGCAGCTCTCCTATGCAGTG-3’  Reverse: 5’-GTGTTTTGGATCGTCAGGGAATA-3’ |
| mMHC-II | Forward: 5’-TGGTGACACTGGGACATTCATC-3’  Forward: 5’-CAGTCTGTCCCCCTGCTAAG-3’ |
| mGAPDH | Forward: 5’-GTGAAGGTCGGTGTGAACGG-3’  Reverse: 5’-TCCTGGAAGATGGTGATGGG-3’ |

**
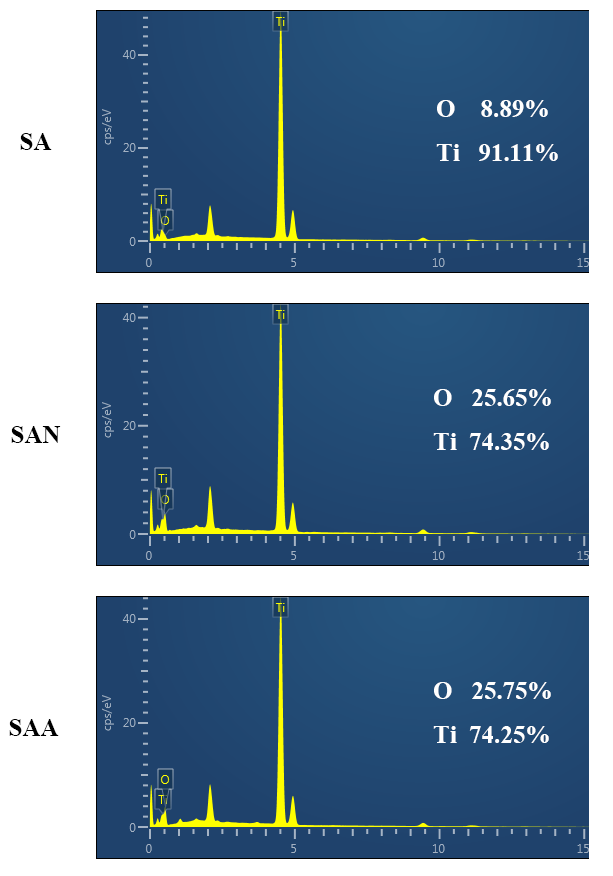
**

**Supplementary Figure 1.** Titanium specimen characteristics. EDS spectra showed the main surface elemental compositions for titanium samples.


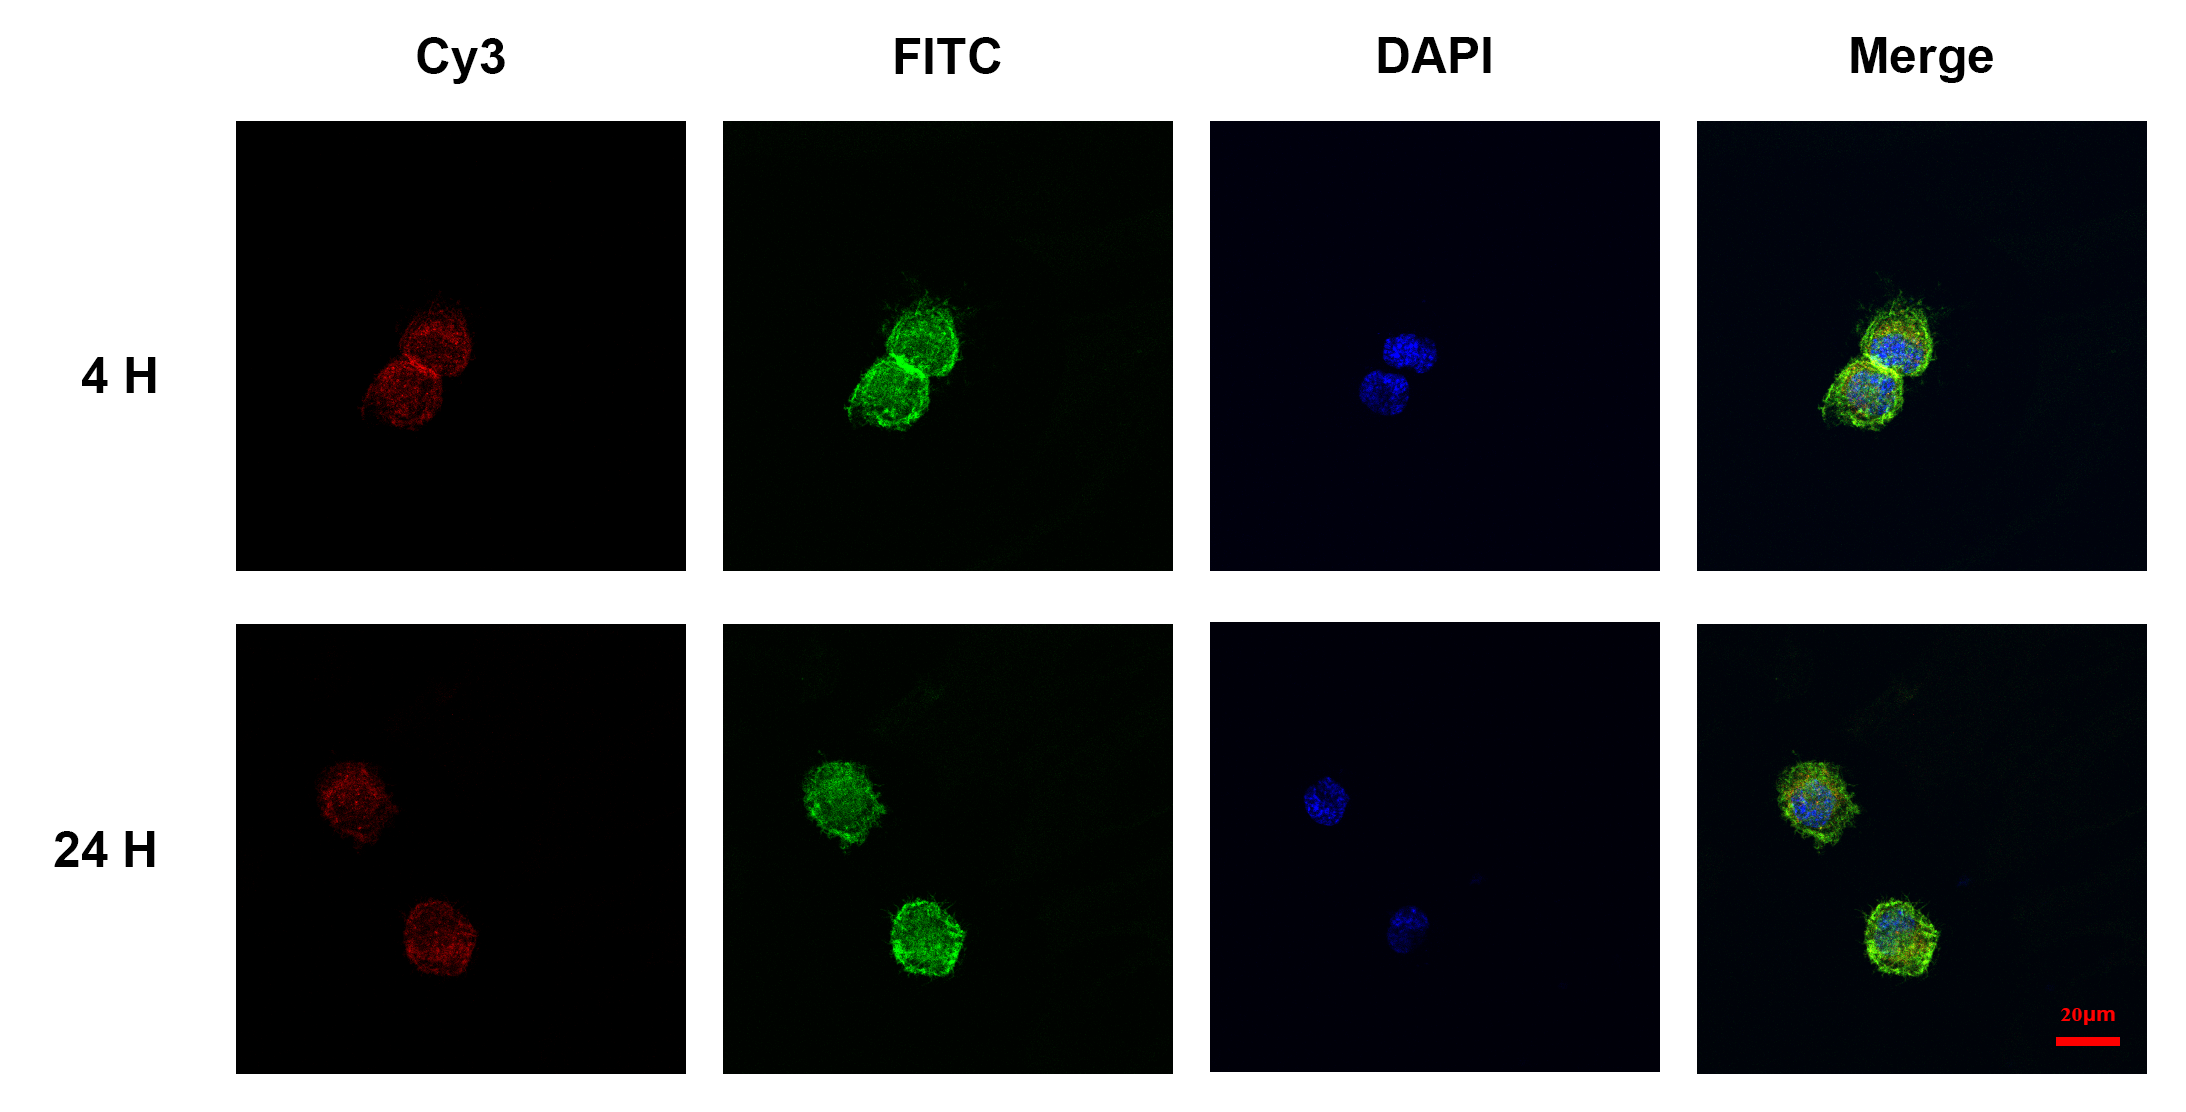


**Supplementary Figure 2.** The fluorescent staining images of vinculin (Red), F-actin (Green) and nuclei (Blue) showing the DC adhesion states on tissue culture plates at 4 h and 24 h.


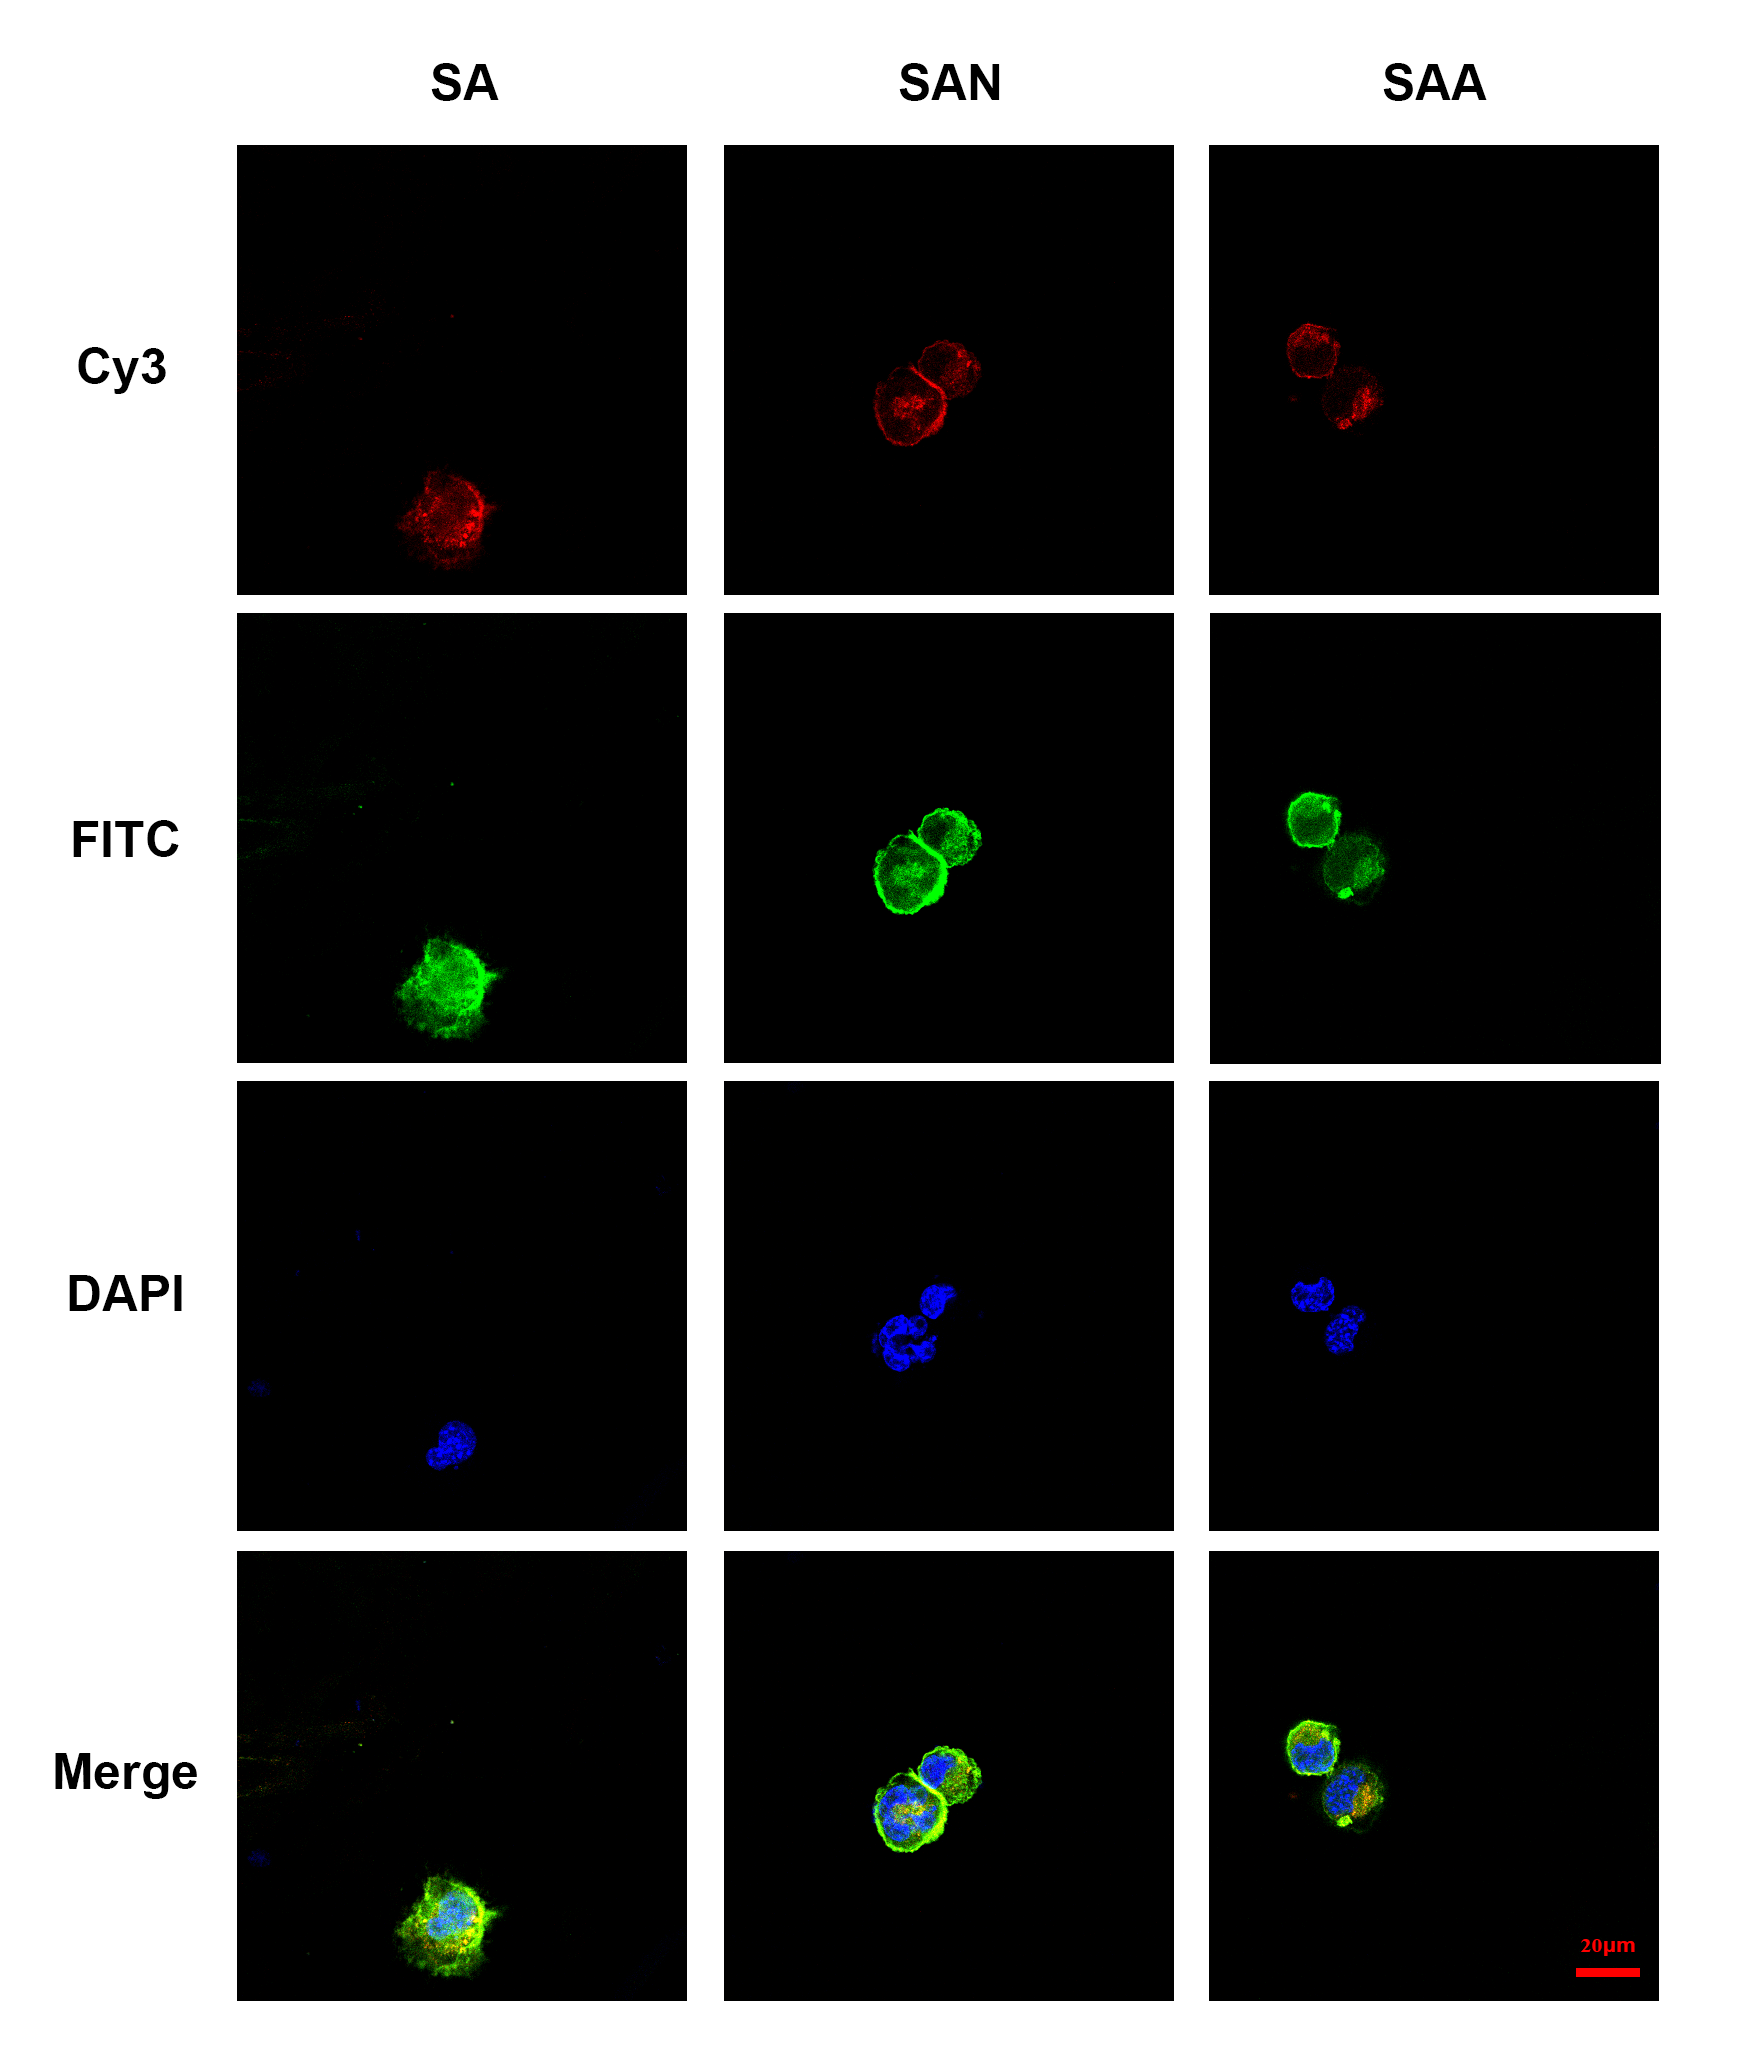


**Supplementary Figure 3.** The fluorescent staining images of vinculin (Red), F-actin (Green) and nuclei (Blue) showing the DC adhesion states on different titanium surfaces at 4 h.

**
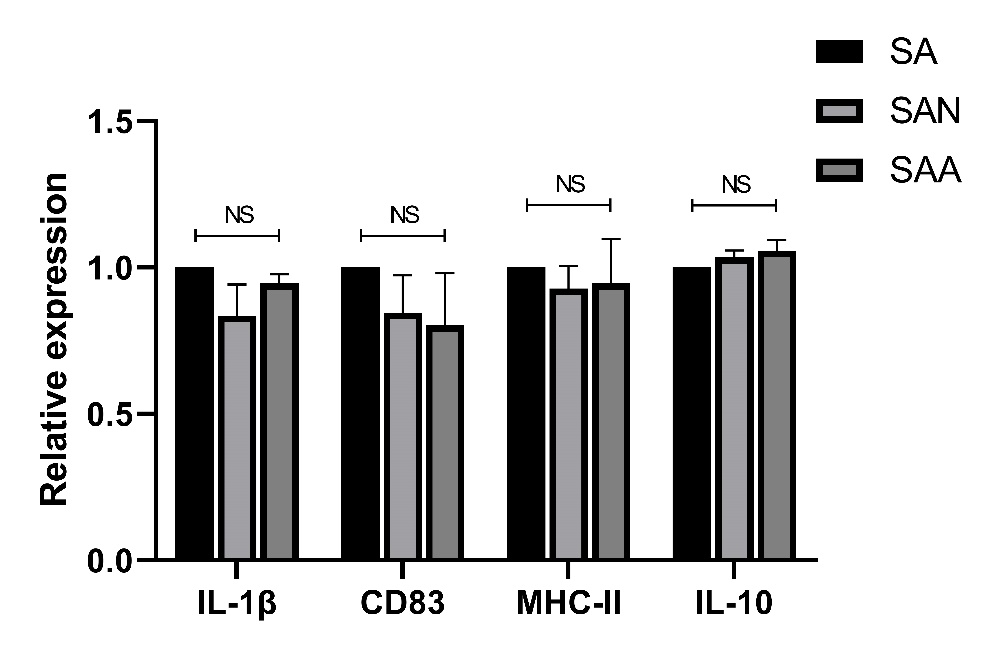
**

**Supplementary Figure 4.** The expression of maturation-related genes IL-1β, CD83, MHC-II and IL-10 at 4 h in DCs cultured on different titanium surfaces. NS= not significant.


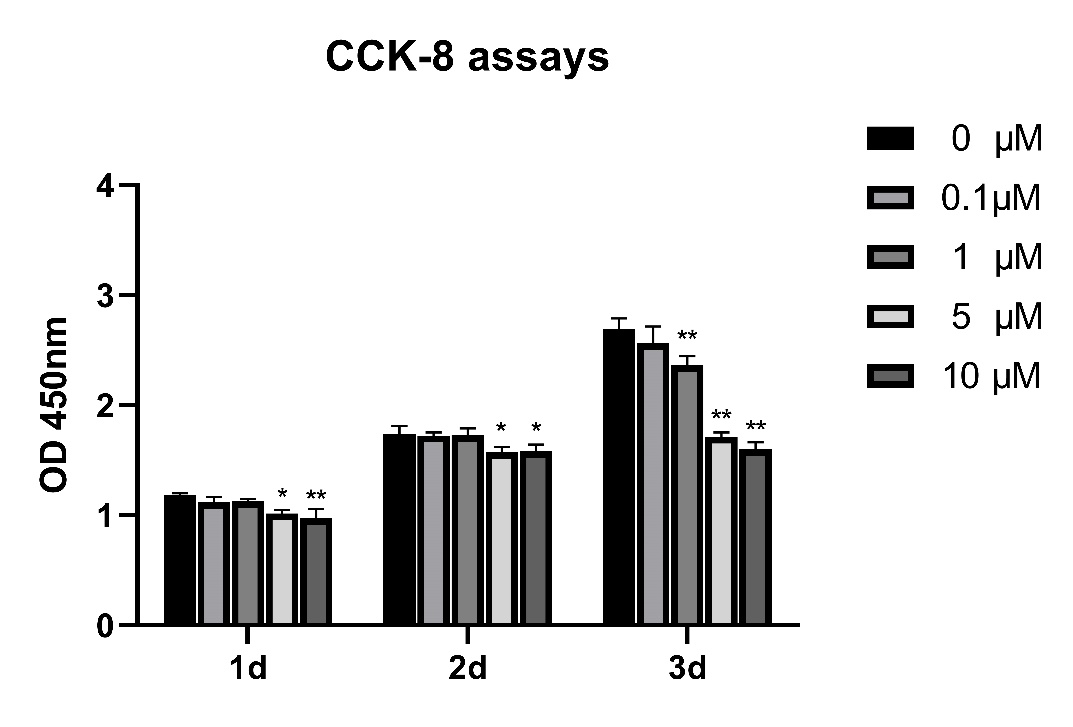


**Supplementary Figure 5.** Effects of different concentrations of TAE226 on DCs proliferative activity tested by CCK-8 assays at different time points. ⁎*P*<0.05, ⁎⁎*P*<0.01 compared with 0μM group.


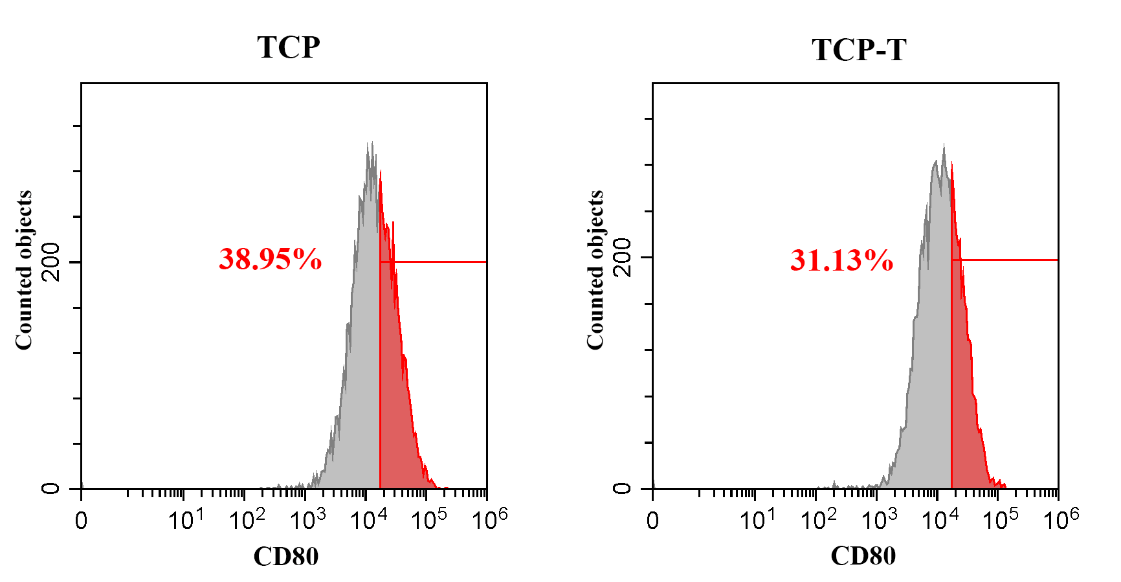


**Supplementary Figure 6.** The CD80 expression of DCs at 24h with or without TAE226 analyzed by flow cytometry.
